# Supplementary material for: The prognostic value of the stem-like group in colorectal cancer using a panel of immunohistochemistry markers
Source: PubMed Central journal article supplement (PMC4494972; doi:10.18632/oncotarget.3497), 2015-03-26
Supplement: oncotarget-06-12763-s001.pdf [file oncotarget-06-12763-s001.pdf]

SUPPLEMENTARY FIGURES AND TABLES

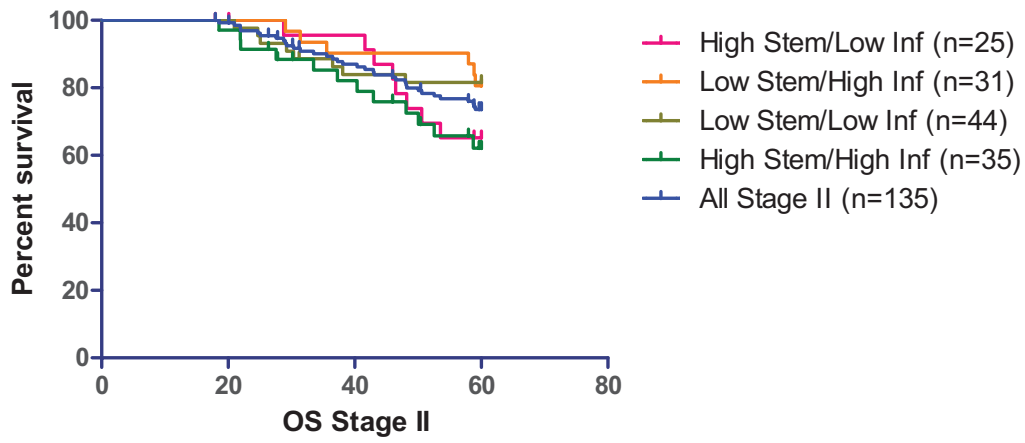

Supplementary Figure S1: Summary of survival differences for different molecular subtypes (MST) in stage 2 CRC cases.

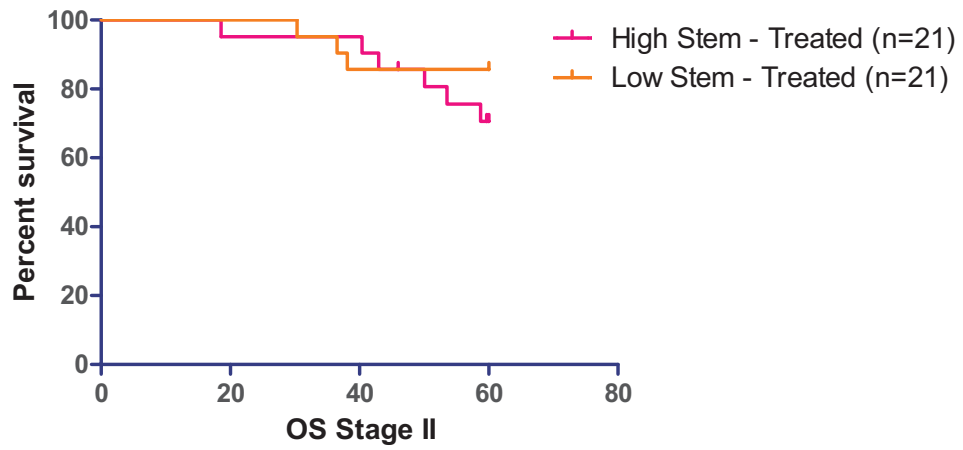

Supplementary Figure S2: Adjuvant therapy did not confer any survival benefits to stage 2 high-stem likes CRC cases.

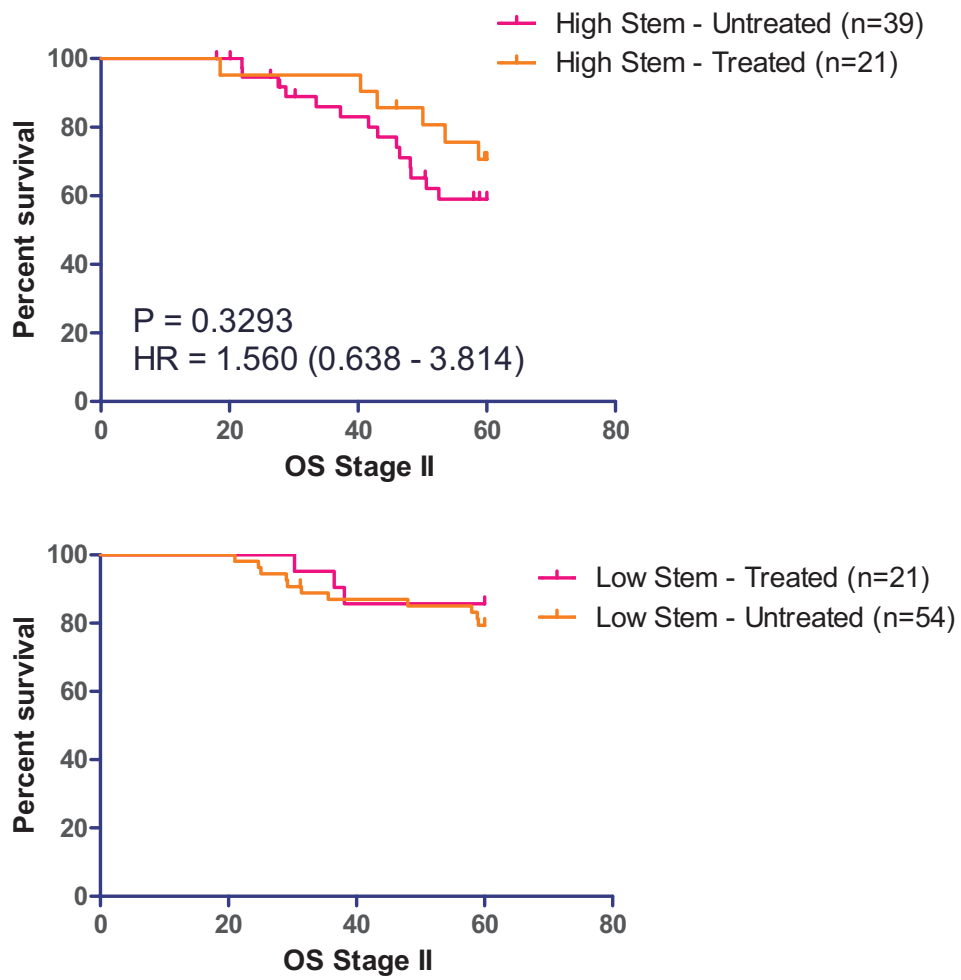

Supplementary Figure S3: High stem-like cases (top figure) showing a trend for treatment benefit in stage 2 CRC cases in contrast to low stem-like cases (bottom figure).

**Supplementary Table S1. Summary of differences for survival duration (months) between high stem-like subgroup and low stem-like subgroup across different stages of CRC**

| Staging | High stem-like group(5 year overall survival) | Low stem-like group(5 year overall survival) | P for log-rank differences |
|---------|-----------------------------------------------|----------------------------------------------|----------------------------|
| I       | 80.34                                         | 89.80                                        | NS                         |
| II      | 61.35                                         | 78.49                                        | 0.0288                     |
| III     | 42.23                                         | 46.85                                        | NS                         |
| IV      | 1.94                                          | 4.53                                         | NS                         |

NS denotes non-significant *p*-values of greater than 0.05.

**Supplementary Table S2. Summary of proportions of different MST subgroups of patients within each disease stage**

| <b>Staging</b> | <b>MST1 (r)<br/>High stem-like/<br/>Low inflammatory</b> | <b>MST2 (b)<br/>High stem-like/<br/>High inflammatory</b> | <b>MST3 (y)<br/>Low stem-like/<br/>High inflammatory</b> | <b>MST4 (g)<br/>Low stem-like/<br/>Low inflammatory</b> |
|----------------|----------------------------------------------------------|-----------------------------------------------------------|----------------------------------------------------------|---------------------------------------------------------|
| I(n = 100)     | 31                                                       | 15                                                        | 13                                                       | 41                                                      |
| II(n = 162)    | 30                                                       | 42                                                        | 39                                                       | 51                                                      |
| III(n = 91)    | 27                                                       | 33                                                        | 13                                                       | 18                                                      |
| IV(n = 140)    | 15                                                       | 52                                                        | 40                                                       | 33                                                      |
